# Supplementary material for: The distribution of Apis laboriosa revisited: range extensions, biogeographic affinities, and species distribution modelling
Source: Frontiers journal article supplement (doi:10.3389/frbee.2024.1374852), 2024-07-22
Supplement: Table_2.DOCX [file Table_2.DOCX]

# **Supplementary Table 2**

Percent contribution and permutation importance of the MaxEnt species distribution model of the predicted occurrence of *Apis laboriosa*; this model wasbased on eight climate variables and six soil variables.

| **Variable** | **Variable description** | **Percent contribution** | **Permutation Importance** |
| --- | --- | --- | --- |
| bio11.asc | Mean temperature of coldest quarter | 43.1 | 53.4 |
| bio4.asc | Temperature seasonality (SD x 100) | 32.9 | 16.0 |
| nitrogen | Nitrogen (cg/kg) | 8.6 | 1.2 |
| ocs | Organic carbon stocks (t/ha) | 6.7 | 3.5 |
| pHwater | pH Water | 2.3 | 5.8 |
| bio18.asc | Precipitation of warmest quarter | 2.0 | 0.4 |
| sand | Sand (g/kg) | 1.0 | 0.3 |
| bio13.asc | Precipitation of wettest month | 1.0 | 0.2 |
| bio12.asc | Annual precipitation | 0.8 | 0.1 |
| bio3.asc | Isothermality (bio2/bio7 x 100) | 0.7 | 16.6 |
| bio2.asc | Mean diurnal temperature range | 0.6 | 0.9 |
| soc | Soil organic carbon (dg/kg) | 0.2 | 0.8 |
| cec | Cation exchange capacity (at pH 7)  (mmol (c) /kg) | 0.1 | 0.6 |
| bio19.asc | Precipitation of coldest quarter | 0 | 0.1 |
